# Supplementary material for: Robustness Evaluation of a Deep Learning Model on Sagittal and Axial Breast DCE-MRIs to Predict Pathological Complete Response to Neoadjuvant Chemotherapy
Source: MDPI journal article supplement (doi:10.3390/jpm12060953), 2022-06-10
Supplement: s1 [file s1]

**Table S1.** Summary of the performances achieved by the pCR prediction models in terms of AUC, Accuracy (Acc.), Sensitivity (Sens.), and Specificity (Spec.) on the training sets of the public DB and private DB. The number of features composing each model is also reported. The best results achieved for each of the evaluation metric are indicated in bold.

| Set                                                              | Model               | N. features | AUC          | Acc.         | Sens.        | Spec.        |
|------------------------------------------------------------------|---------------------|-------------|--------------|--------------|--------------|--------------|
| <b>public DB<br/>training set:<br/>106 patients<br/>(29 pCR)</b> | clinical            | 5           | 51.0%        | 58.5%        | 31.0%        | 68.8%        |
|                                                                  | F-pool1             | 10          | 82.6%        | 71.7%        | 68.9%        | 72.7%        |
|                                                                  | F-pool2             | 13          | 73.7%        | 79.2%        | 34.5%        | <b>96.1%</b> |
|                                                                  | F-pool5             | 6           | 81.7%        | 77.4%        | 62.1%        | 83.1%        |
|                                                                  | F-merged            | 29          | 86.7%        | 81.1%        | 62.1%        | 88.3%        |
|                                                                  | F-merged + clinical | 34          | <b>92.9%</b> | <b>82.1%</b> | <b>75.9%</b> | 84.4%        |
| <b>private DB<br/>training set:<br/>52 patients<br/>(15 pCR)</b> | clinical            | 5           | 59.8%        | 55.8%        | 13.3%        | 73.0%        |
|                                                                  | F-pool1             | 12          | 82.7%        | 80.7%        | 73.3%        | 83.8%        |
|                                                                  | F-pool2             | 11          | 74.6%        | 84.6%        | 66.7%        | <b>91.9%</b> |
|                                                                  | F-pool5             | 5           | 73.2%        | 76.9%        | 53.3%        | 86.5%        |
|                                                                  | F-merged            | 28          | 86.1%        | 80.8%        | 86.7%        | 78.4%        |
|                                                                  | F-merged + clinical | 33          | <b>88.4%</b> | <b>88.5%</b> | <b>86.7%</b> | 89.2%        |
